# Supplementary material for: Estimating mean population salt intake in Fiji and Samoa using spot urine samples
Source: Nutr J. 2019 Sep 10;18:55. doi: 10.1186/s12937-019-0484-9 (PMC6737719; doi:10.1186/s12937-019-0484-9)
Supplement: Supplementary file 1 — Spot equations to estimate 24-h sodium excretion (mmol/day). Contains the six equations used to estimate 24-h sodium excretion from spot urine samples: Kawasaki, Tanaka, Mage, INTERSALT with and without potassium, and Toft. (DOCX 16 kb) [file 12937_2019_484_MOESM1_ESM.docx]

**Additional file 1. Spot equations to estimate 24-hour sodium excretion (mmol/day)**

| **Kawasaki equation, 1993** | |
| --- | --- |
| **M** |  |
| **F** |  |
| **Tanaka equation, 2002** | |
|  |  |
| **Mage equation, 2008** | |
| **M** | where A = 1 if African American or Black race, and A = 0 if another race |
| **F** | where A = 1 if African American or Black race, and A = 0 if another race |
| **INTERSALT with potassium equation (North America), 2013** | |
| **M** |  |
| **F** |  |
| **INTERSALT without potassium equation (North America), 2013** | |
| **M** |  |
| **F** |  |
| **Toft equation, 2014** | |
| **M** |  |
| **F** |  |

SNa = spot sodium; SCr = spot creatinine; SK = spot potassium; ht = height; wt = weight; BMI = body mass index; SNa in mmol/L; SK in mmol/L; SCr in mmol/L for the INTERSALT equations, in mg/dL for the other four equations; age in years; weights in kilograms; height in centimetres; BMI in kg/m2
